# Supplementary material for: Highly crystalline and efficient red-emissive π-conjugated polymer film: tuning of macrostructure for light-emitting properties
Source: Royal Society of Chemistry journal article supplement (doi:10.1039/d0ma00218f), 2020-01-01
Supplement: d0ma00218f1.pdf [file d0ma00218f1.pdf]

*Supporting information*

## Highly crystalline and efficient red-emissive $\pi$ -conjugated polymer film: Tuning of macrostructure for light-emitting properties

Shotaro Hayashi\*<sup>a</sup>

<sup>a</sup> School of Environmental Science and Engineering, Kochi University of Technology, Kami, Kochi, 782-8502, Japan. E-mail: [hayashi.shotaro@kochi-tech.ac.jp](mailto:hayashi.shotaro@kochi-tech.ac.jp)

**Scheme S1.** Direct Arylation Polycondensation.

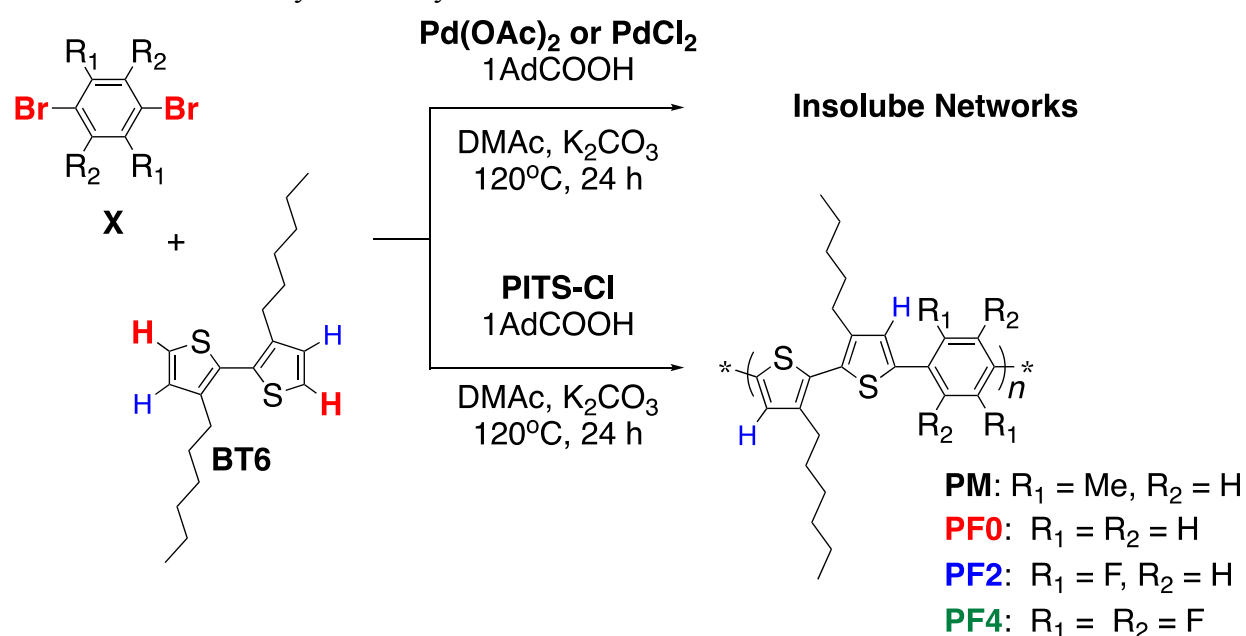

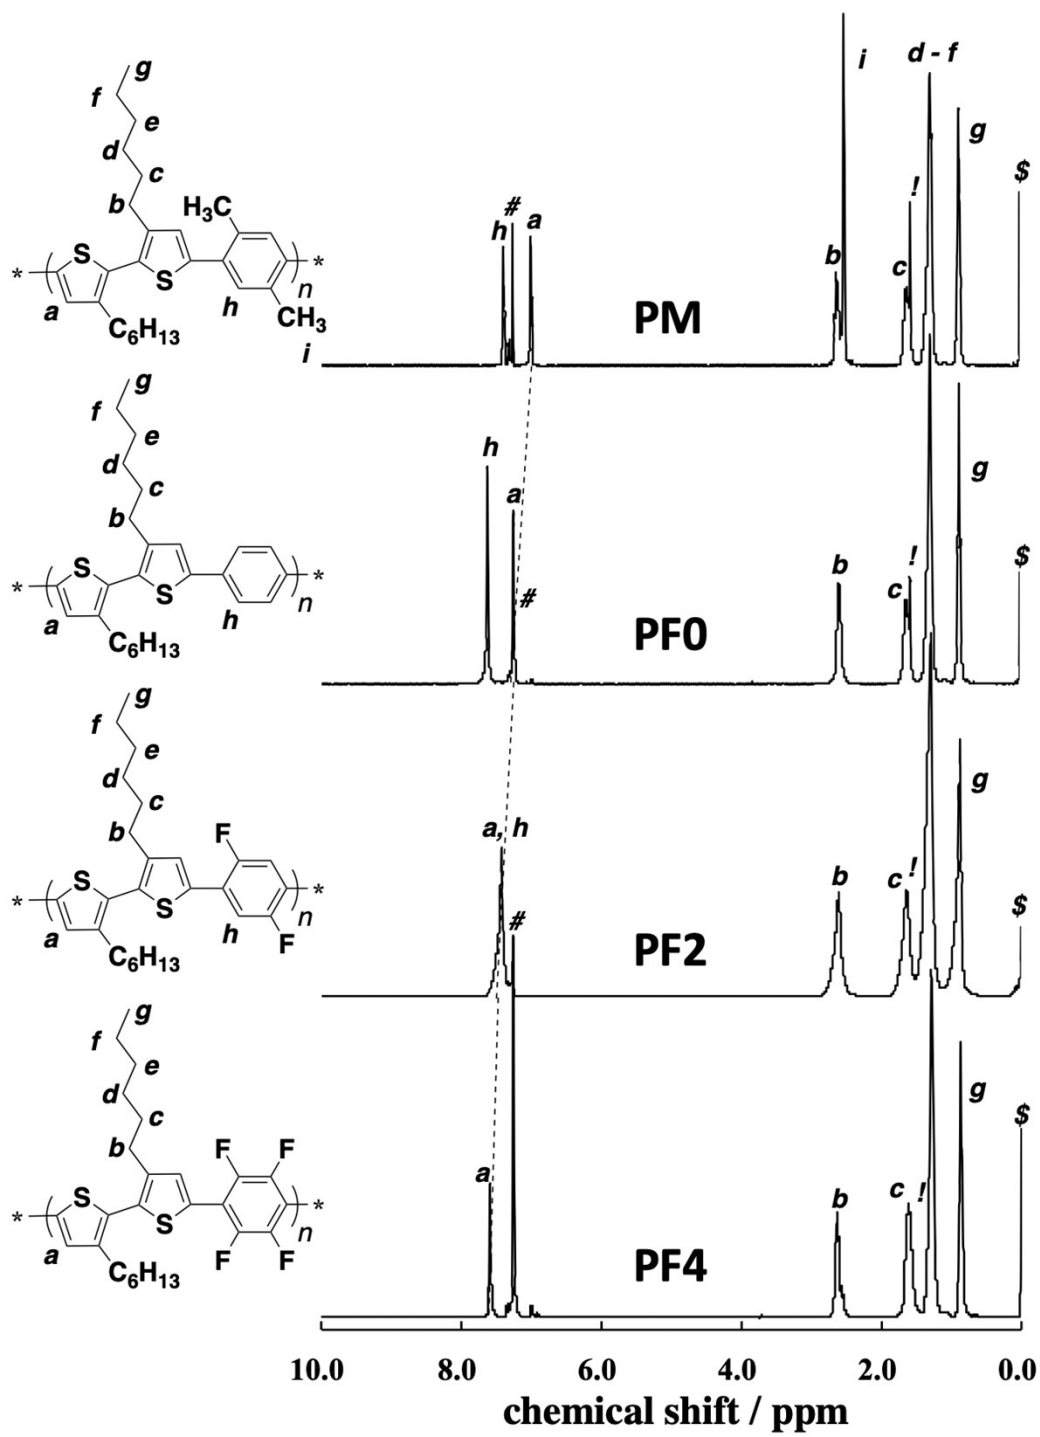

Fig. S1  $^1\text{H}$  NMR spectra of the polymers.

**Table S1.** Molecular Weight and Thermal Properties of the Polymers

| Polymers   | $M_n^a$           | $M_w/M_n^a$       | $T_m^b$ | $T_{d5\%}^c$ |
|------------|-------------------|-------------------|---------|--------------|
| <b>PM</b>  | 4400              | 1.63              | -       | 387          |
| <b>PF0</b> | 16700             | 2.86              | -       | 451          |
| <b>PF2</b> | 16300             | 3.78              | -       | 386          |
| <b>PF4</b> | 6300 <sup>d</sup> | 1.22 <sup>d</sup> | 183     | 413          |

<sup>a</sup> Measured by GPC (standard: polystyrene, eluent: THF). <sup>b</sup> Measured by DSC. <sup>c</sup> Measured by TGA. <sup>d</sup> Insoluble in THF at 40 °C. GPC measurement was performed by soluble part in THF at room temperature.

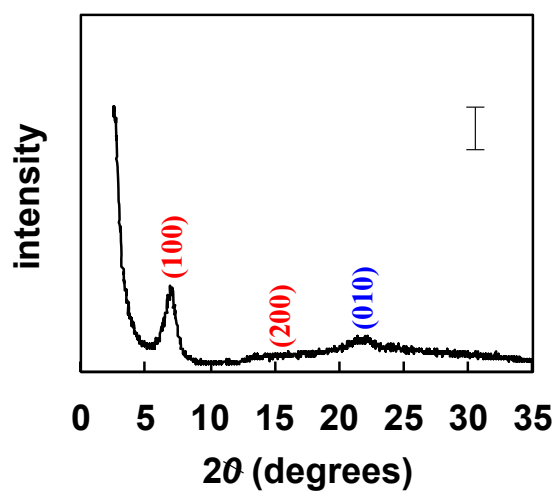**Fig. S2** XRD of PF4.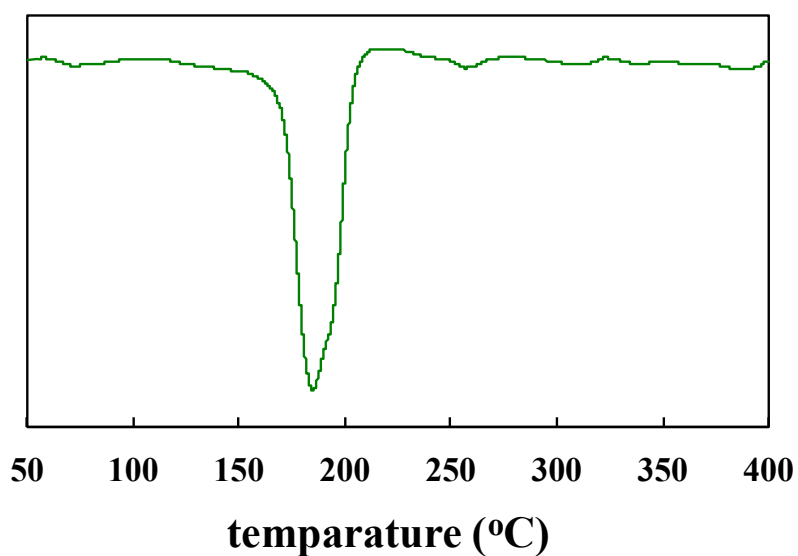**Fig. S3** DSC trace of PF4.

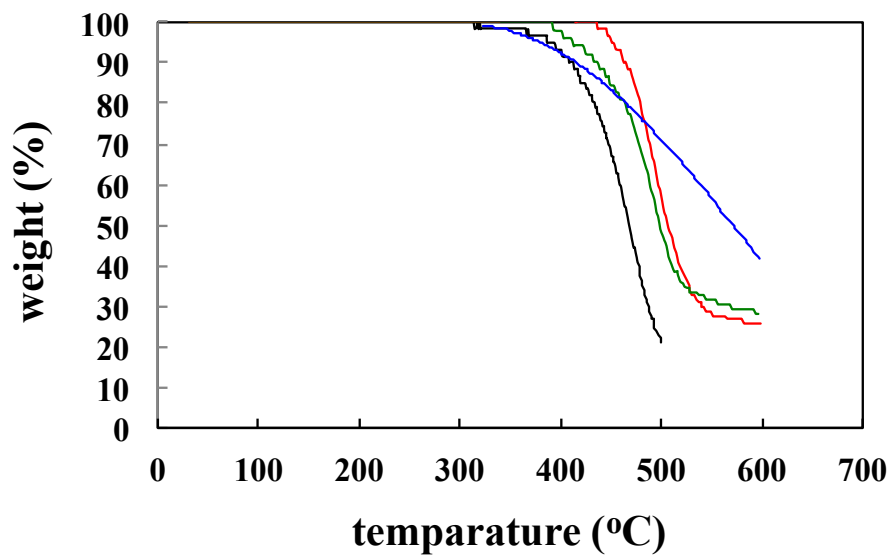

Fig. S4 TGA traces of the polymers. Black: **PM**. Red: **PF0**. Blue: **PF2**. Green: **PF4**.

**Table S2.** Results of Optical Properties

| Polymers   | $\lambda^{ab}$ (nm) | $\lambda^{fl}$ (nm) | $\lambda^{ab}$ (nm) | $\lambda^{fl}$ (nm) | $\Phi^{fl}$       |        |      |
|------------|---------------------|---------------------|---------------------|---------------------|-------------------|--------|------|
|            | CHCl <sub>3</sub>   |                     | Film                |                     | CHCl <sub>3</sub> | Powder | Film |
| <b>PM</b>  | 340                 | 501                 | 340                 | 499                 | 15                | 14     | 13   |
| <b>PF0</b> | 380                 | 505                 | 384                 | 505                 | 12                | 12     | 16   |
| <b>PF2</b> | 391                 | 502                 | 398                 | 511                 | 24                | 25     | 16   |
| <b>PF4</b> | 382                 | 506                 | 484, 521            | 653                 | 23                | 12     | 23   |

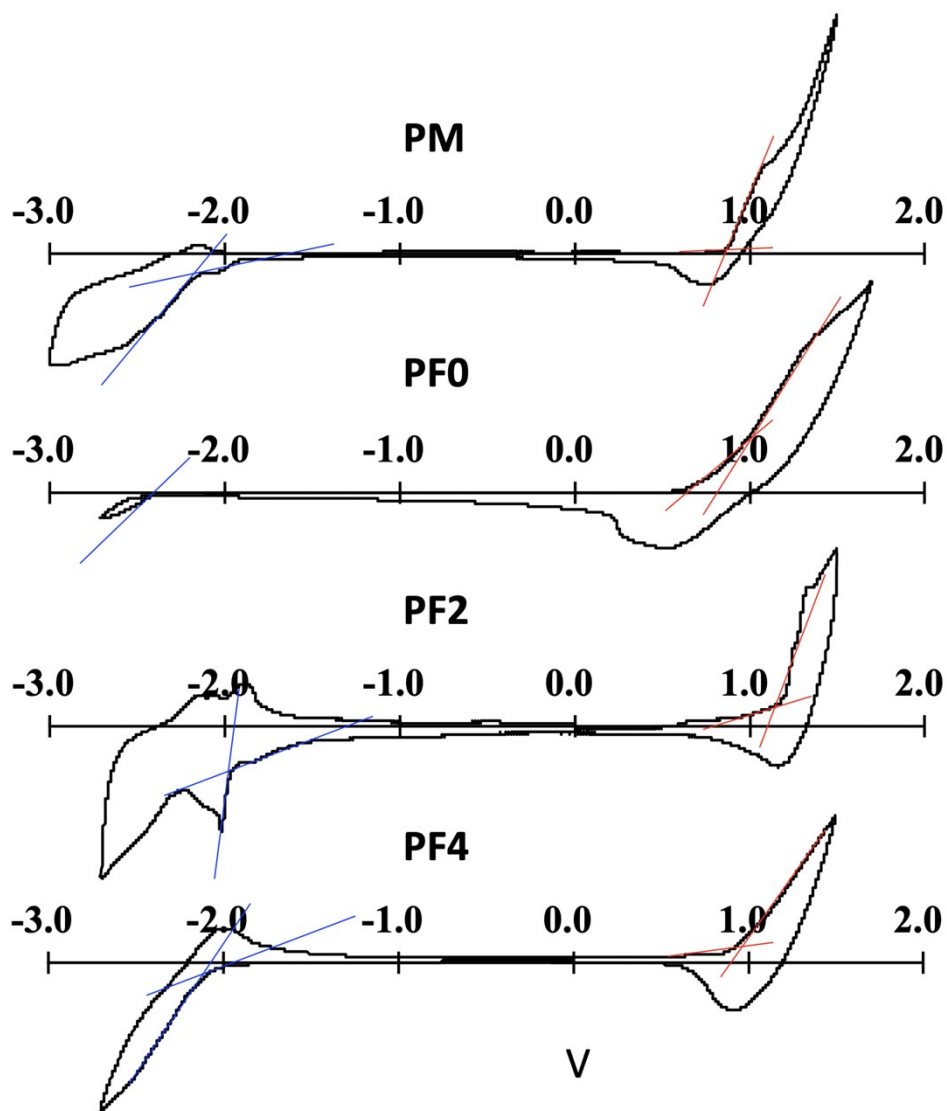

Fig. S5 CV of the polymer films.

Table S3. HOMO and LUMO levels of the polymers

| Polymers | HOMO | LUMO | $E_g$ |
|----------|------|------|-------|
| PM       | 5.26 | 2.15 | 3.11  |
| PF0      | 5.37 | 1.85 | 3.52  |
| PF2      | 5.62 | 2.40 | 3.22  |
| PF4      | 5.35 | 2.31 | 3.04  |

$$I_p(\text{LUMO}) = -(E_{\text{onset,red}} + 4.38) \text{ (eV)}$$

$$E_a(\text{LUMO}) = -(E_{\text{onset,red}} + 4.38) \text{ (eV)}$$

$$E_g = (E_a(\text{LUMO}) - I_p(\text{HOMO})) \text{ (eV)}$$

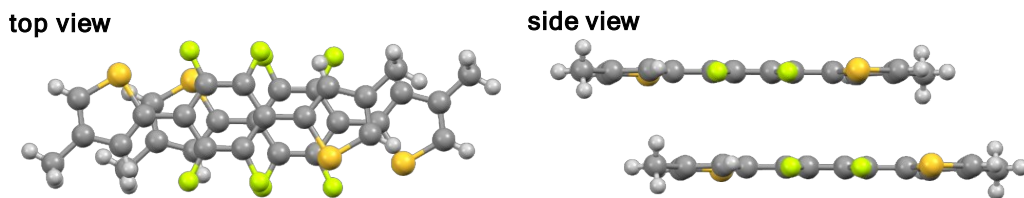

Fig. S6 Crystal structure (packing) of B1PF4.

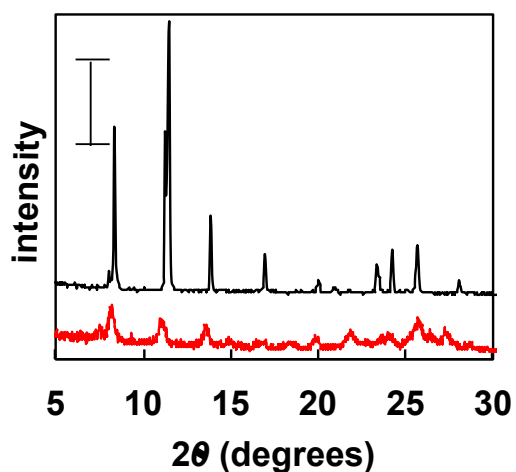

Fig. S7 XRD of BT1PF4 crystal and powder.

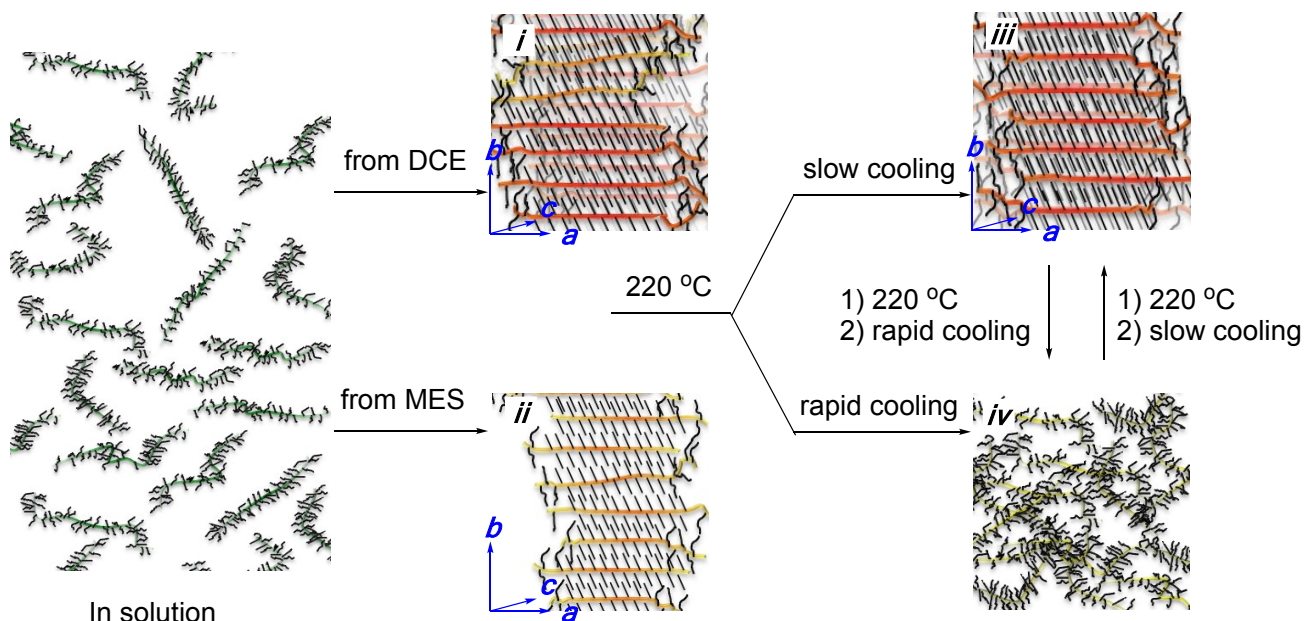

Fig. S8 Schematic illustration of plausible macrostructure of PF4 chain. In solution and on macrostructure of  $Film_{DCE}$ ,  $Film_{MES}$ , film after annealing then slow cooling, film after annealing then rapid cooling.
